# Supplementary material for: ISAnalytics enables longitudinal and high-throughput clonal tracking studies in hematopoietic stem cell gene therapy applications
Source: PubMed Central journal article supplement (PMC9910212; doi:10.1093/bib/bbac551), 2022-12-21

## Supplementary Figure 2

### A Bootstrap simulation benchmarks

Comparison of average time elapsed between classical and tidy approaches

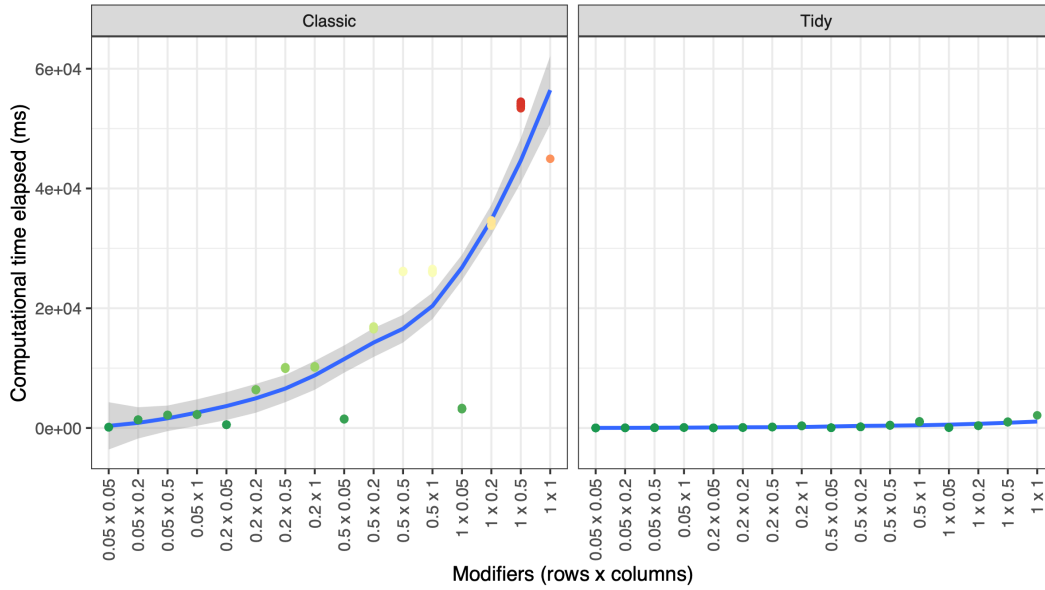

### B Bootstrap simulation: fold change

Fold change between tidy and classical approaches, calculated as  $c(t-t)/t$ , where  $t$  is the average time for tidy and  $c$  is the average time for classical

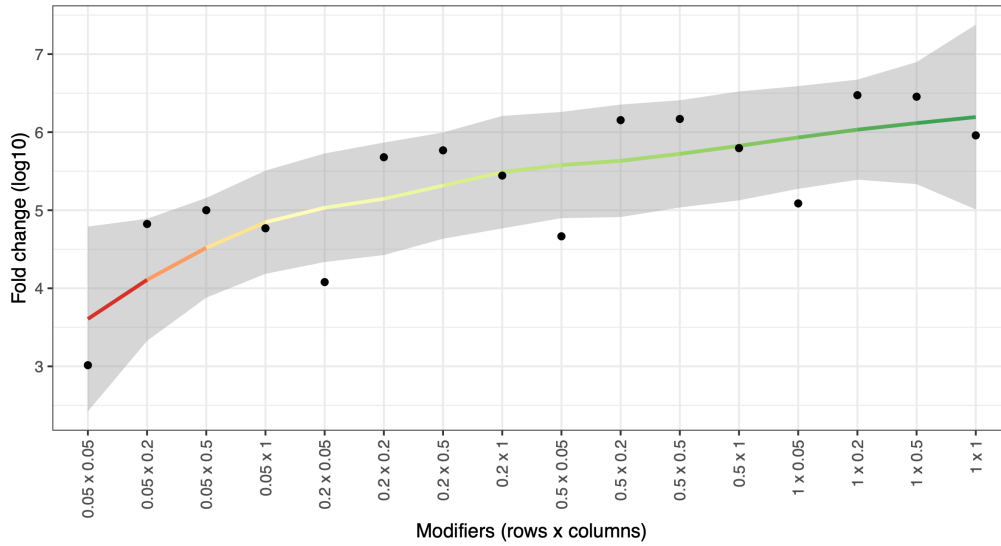

### Supplementary Figure 3

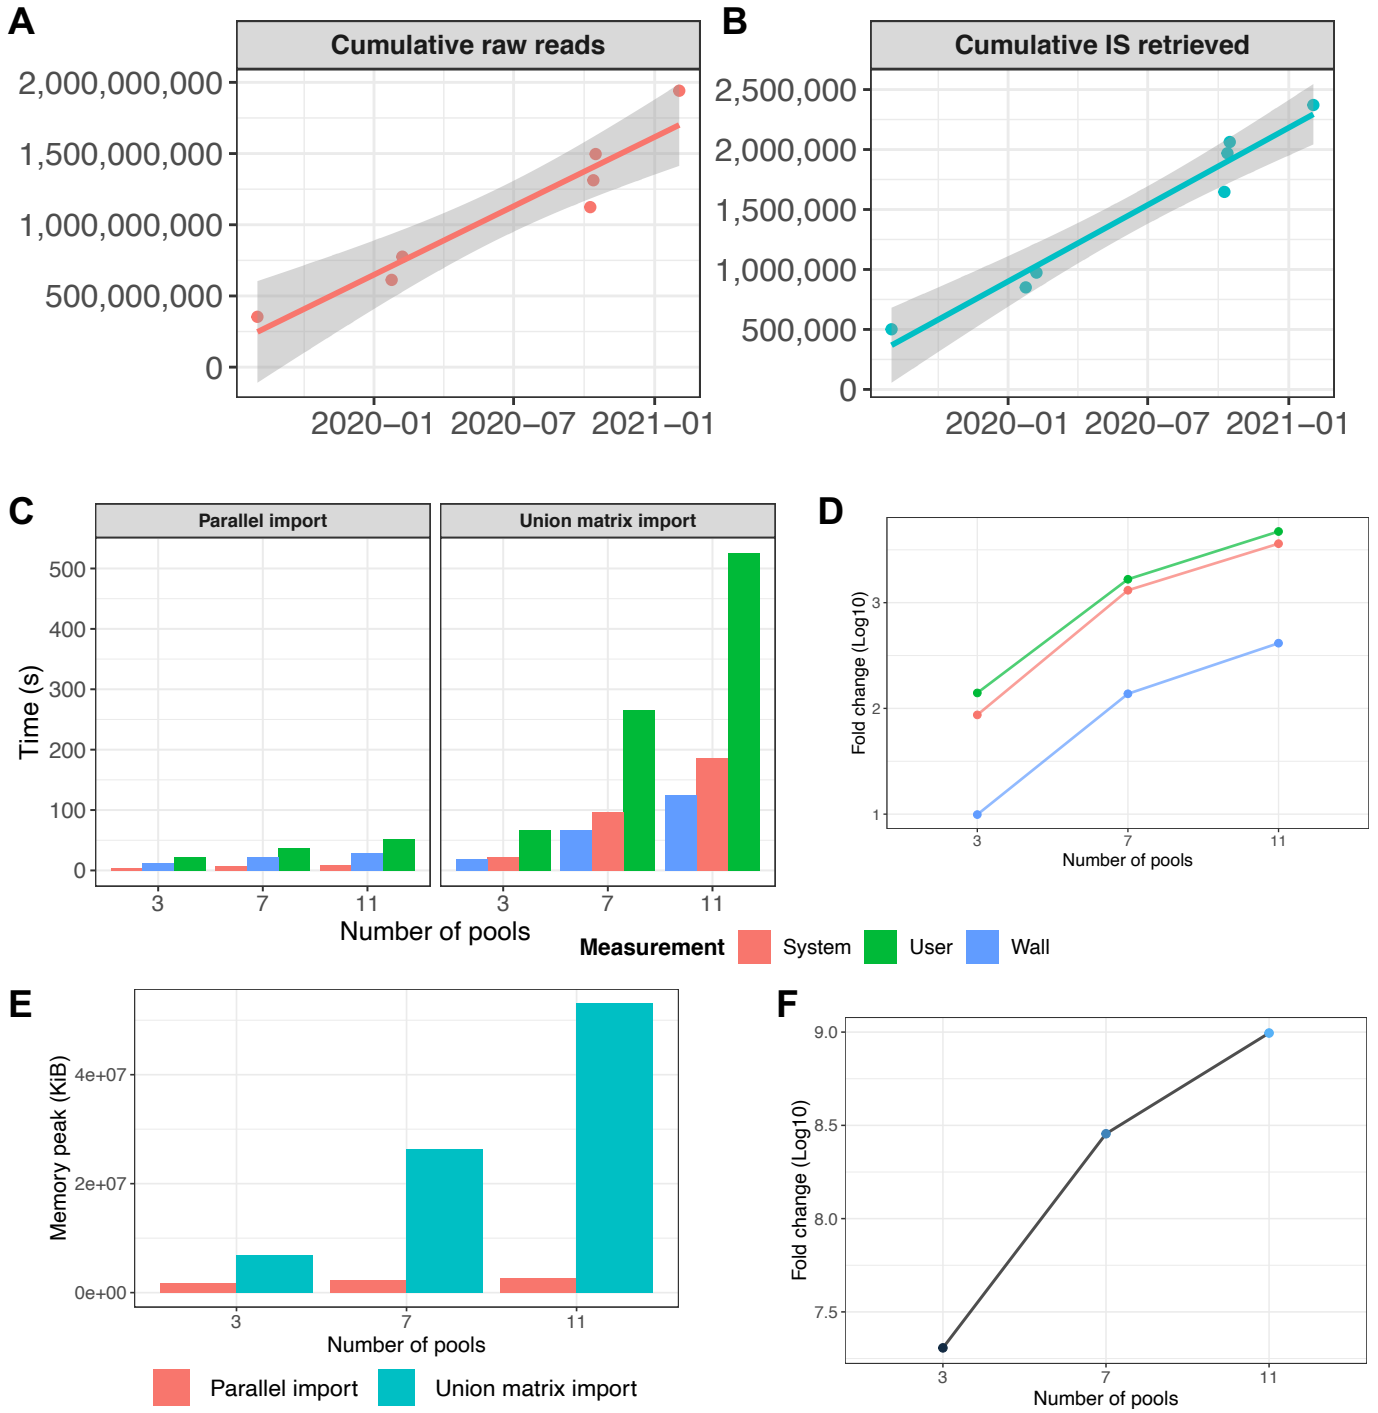

# Supplementary Figure 4

## A

ISAnalytics - Matrix import report 2022-03-08 Files found Import summary Annotation issues Reproducibility [Website](#) [GitHub](#)

Files counts by quantification Files found per project/pool About

Show 10 entries Search:

| ProjectID | concatenatePoolIDSeqRun | Quantification type | Found |
|-----------|-------------------------|---------------------|-------|
| All       | All                     | All                 | All   |
| MPSIH     | POOL01-1                | fragmentEstimate    | 1 ✓   |
| MPSIH     | POOL01-1                | seqCount            | 1 ✓   |
| MPSIH     | POOL02-1                | fragmentEstimate    | 1 ✓   |
| MPSIH     | POOL02-1                | seqCount            | 1 ✓   |
| MPSIH     | POOL03-1                | fragmentEstimate    | 1 ✓   |
| MPSIH     | POOL03-1                | seqCount            | 1 ✓   |
| MPSIH     | POOL04-1                | fragmentEstimate    | 1 ✓   |
| MPSIH     | POOL04-1                | seqCount            | 1 ✓   |

Showing 1 to 10 of 22 entries

Previous 1 2 3 Next

## B

ISAnalytics - Matrix import report 2022-03-08 Files found Import summary Annotation issues Reproducibility [Website](#) [GitHub](#)

Summary of files imported About

Show 10 entries Search:

| ProjectID | concatenatePoolIDSeqRun | Quantification type | Files chosen                                                                                | Imported |
|-----------|-------------------------|---------------------|---------------------------------------------------------------------------------------------|----------|
| All       | All                     | All                 | All                                                                                         | All      |
| MPSIH     | POOL01-1                | fragmentEstimate    | ./MPSIH/quantification/POOL01-1/MPSIH_POOL01-1_fragmentEstimate_matrix.no0.annotated.tsv.gz | TRUE     |
| MPSIH     | POOL02-1                | fragmentEstimate    | ./MPSIH/quantification/POOL02-1/MPSIH_POOL02-1_fragmentEstimate_matrix.no0.annotated.tsv.gz | TRUE     |
| MPSIH     | POOL03-1                | fragmentEstimate    | ./MPSIH/quantification/POOL03-1/MPSIH_POOL03-1_fragmentEstimate_matrix.no0.annotated.tsv.gz | TRUE     |
| MPSIH     | POOL04-1                | fragmentEstimate    | ./MPSIH/quantification/POOL04-1/MPSIH_POOL04-1_fragmentEstimate_matrix.no0.annotated.tsv.gz | TRUE     |
| MPSIH     | POOL05-1                | fragmentEstimate    | ./MPSIH/quantification/POOL05-1/MPSIH_POOL05-1_fragmentEstimate_matrix.no0.annotated.tsv.gz | TRUE     |

Showing 1 to 10 of 22 entries

Previous 1 2 3 Next

# Supplementary Figure 5

compute\_near\_integrations

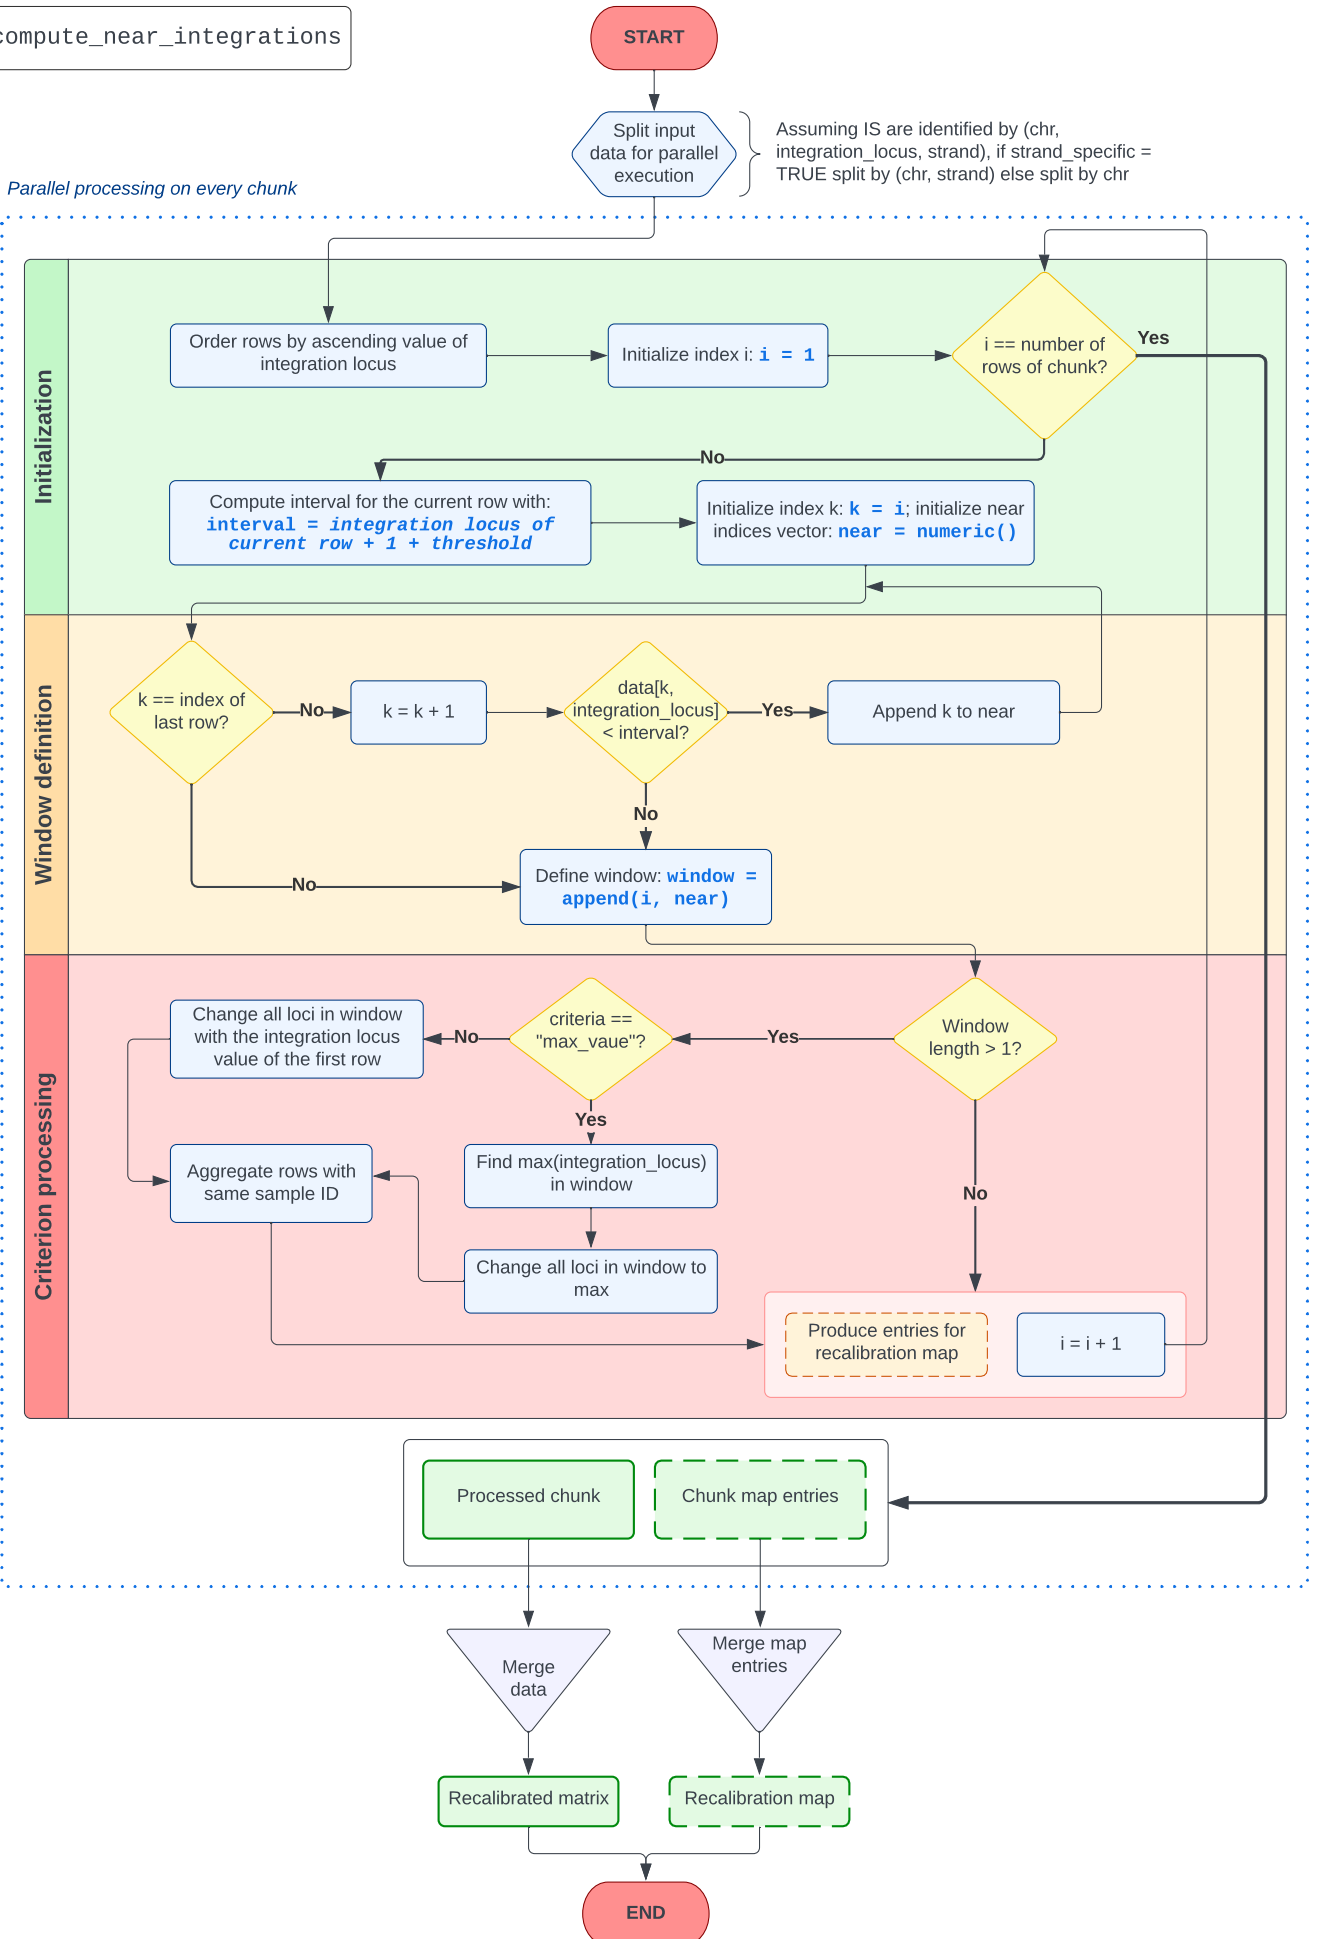

# Supplementary Figure 6

A

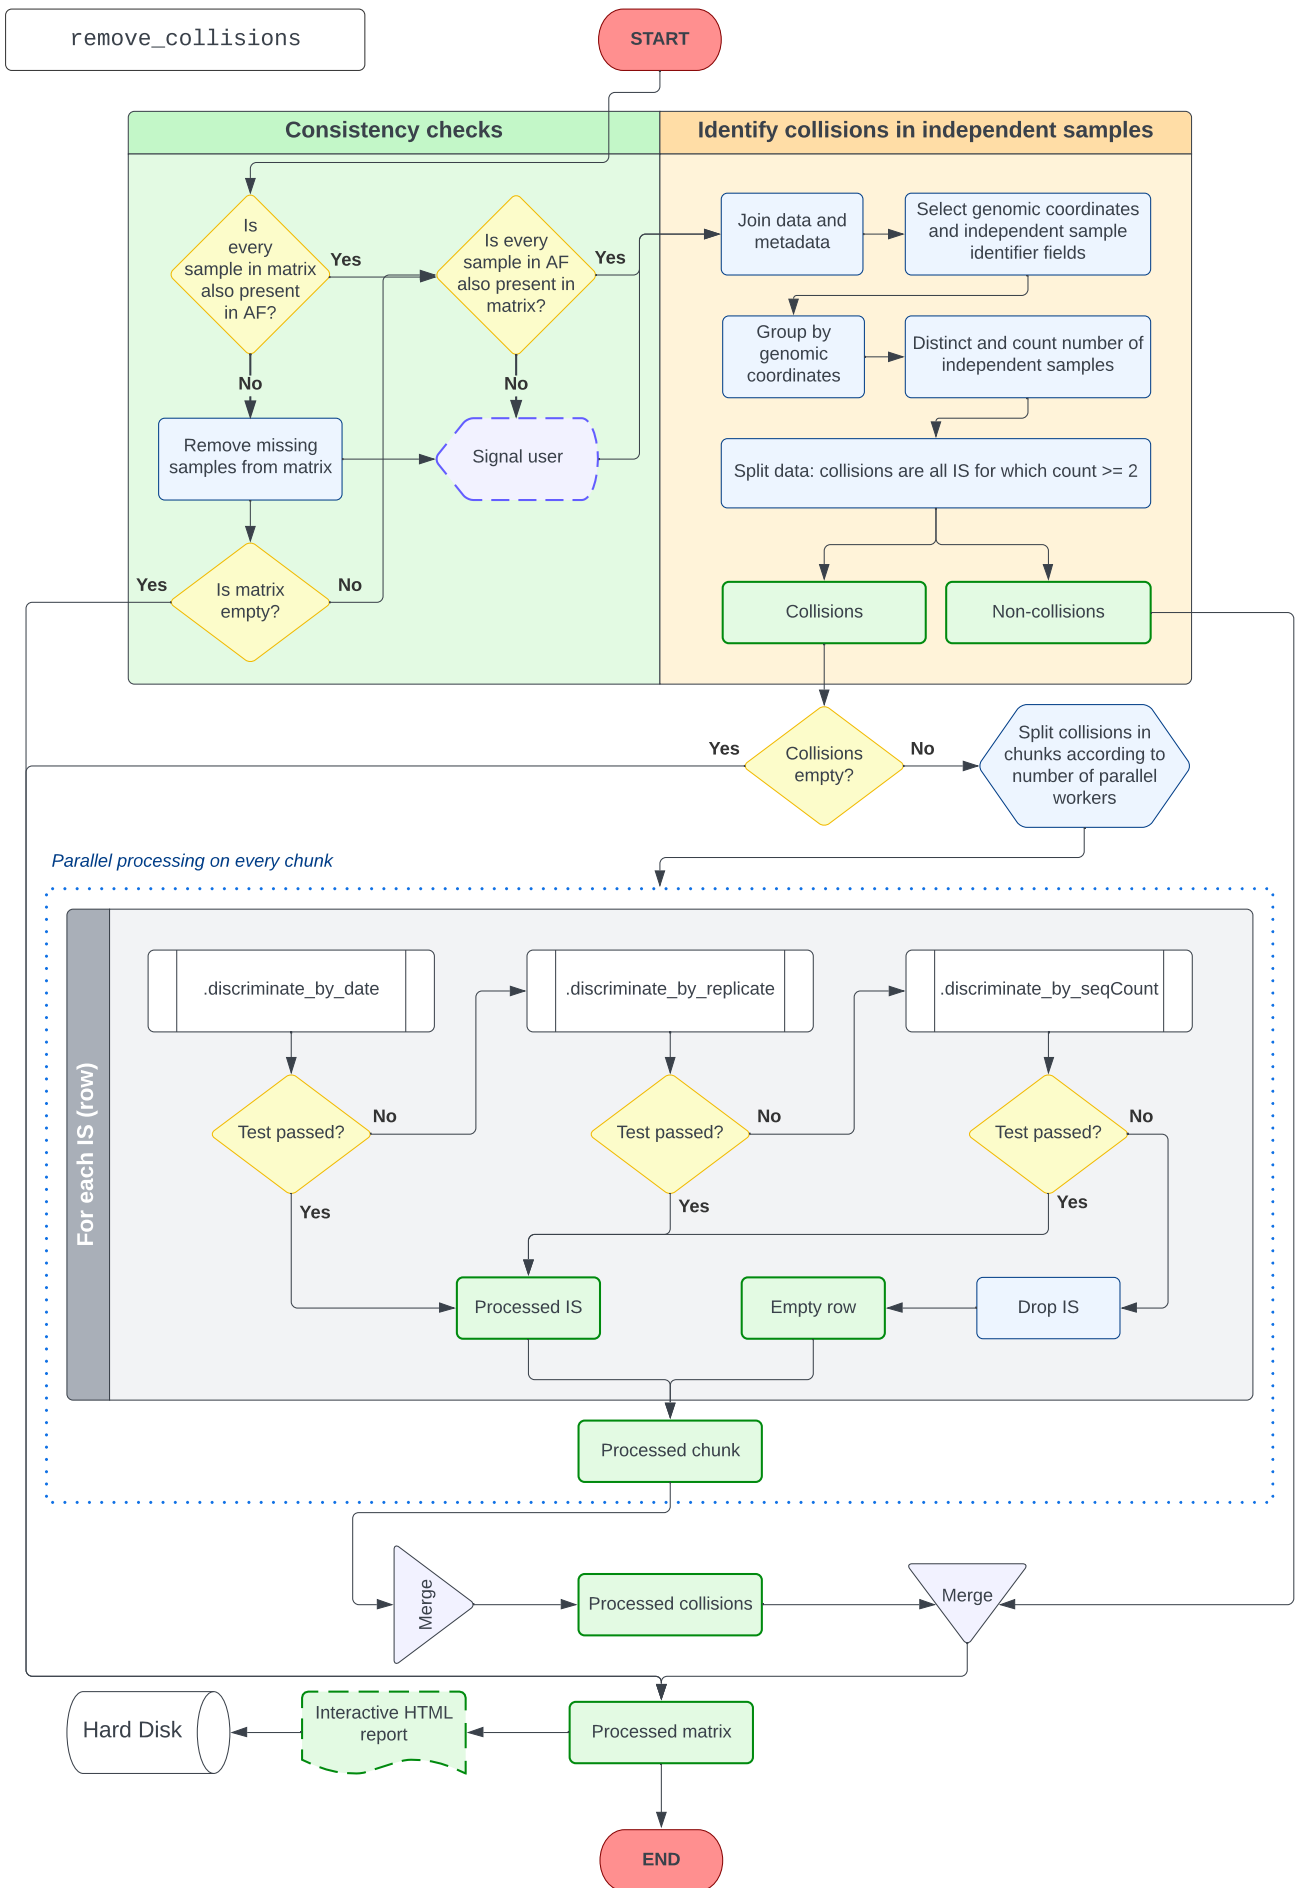

Supplementary Figure 6 (continued from the previous page)

B

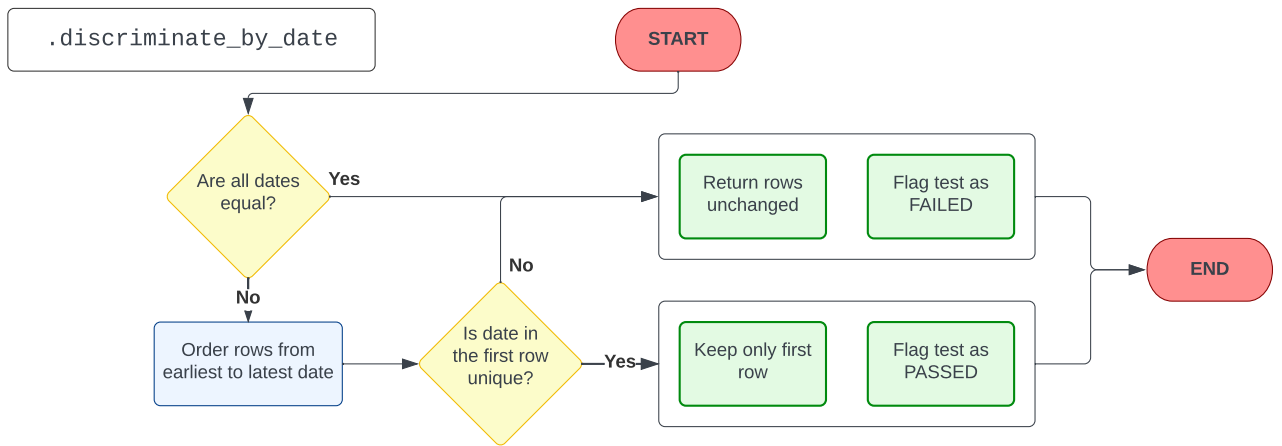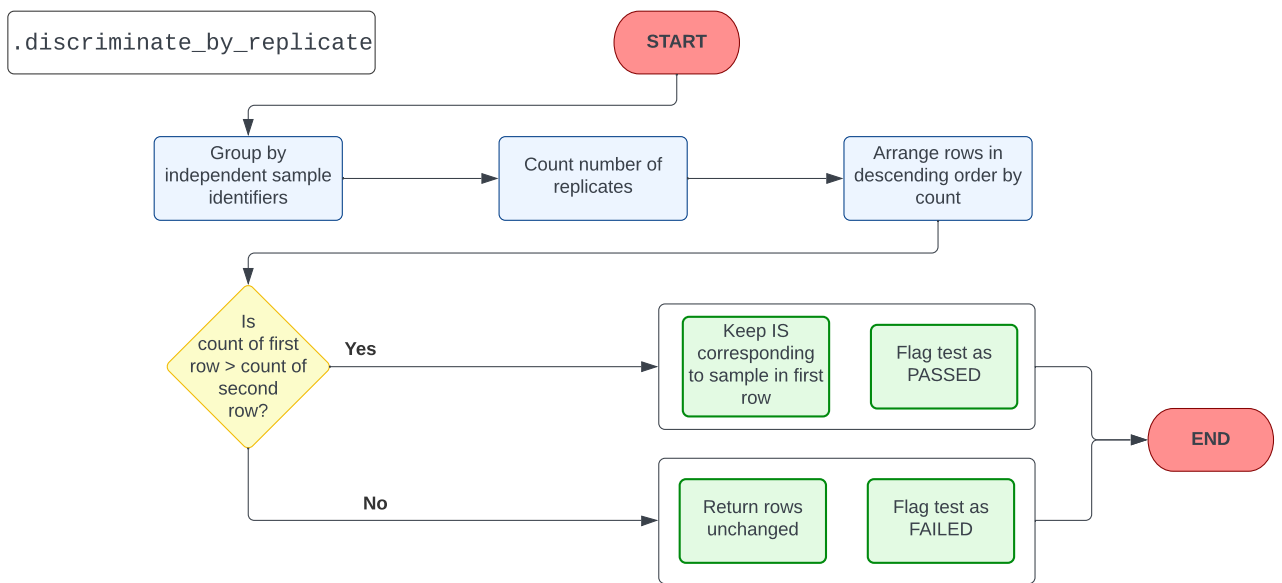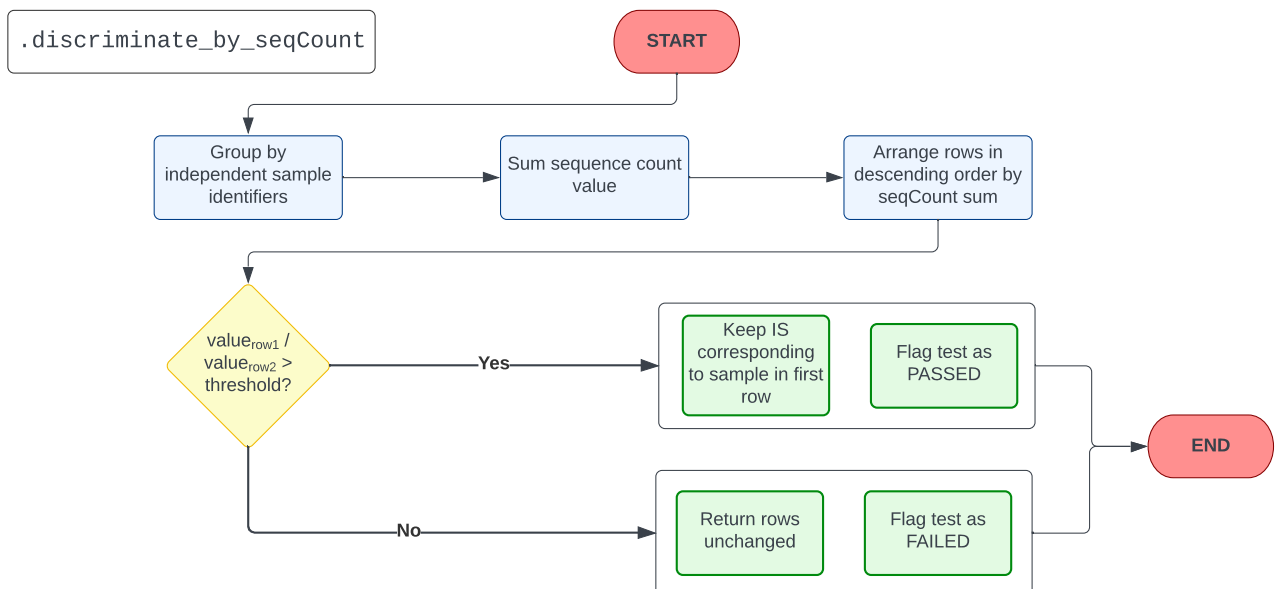

Supplementary Figure 7

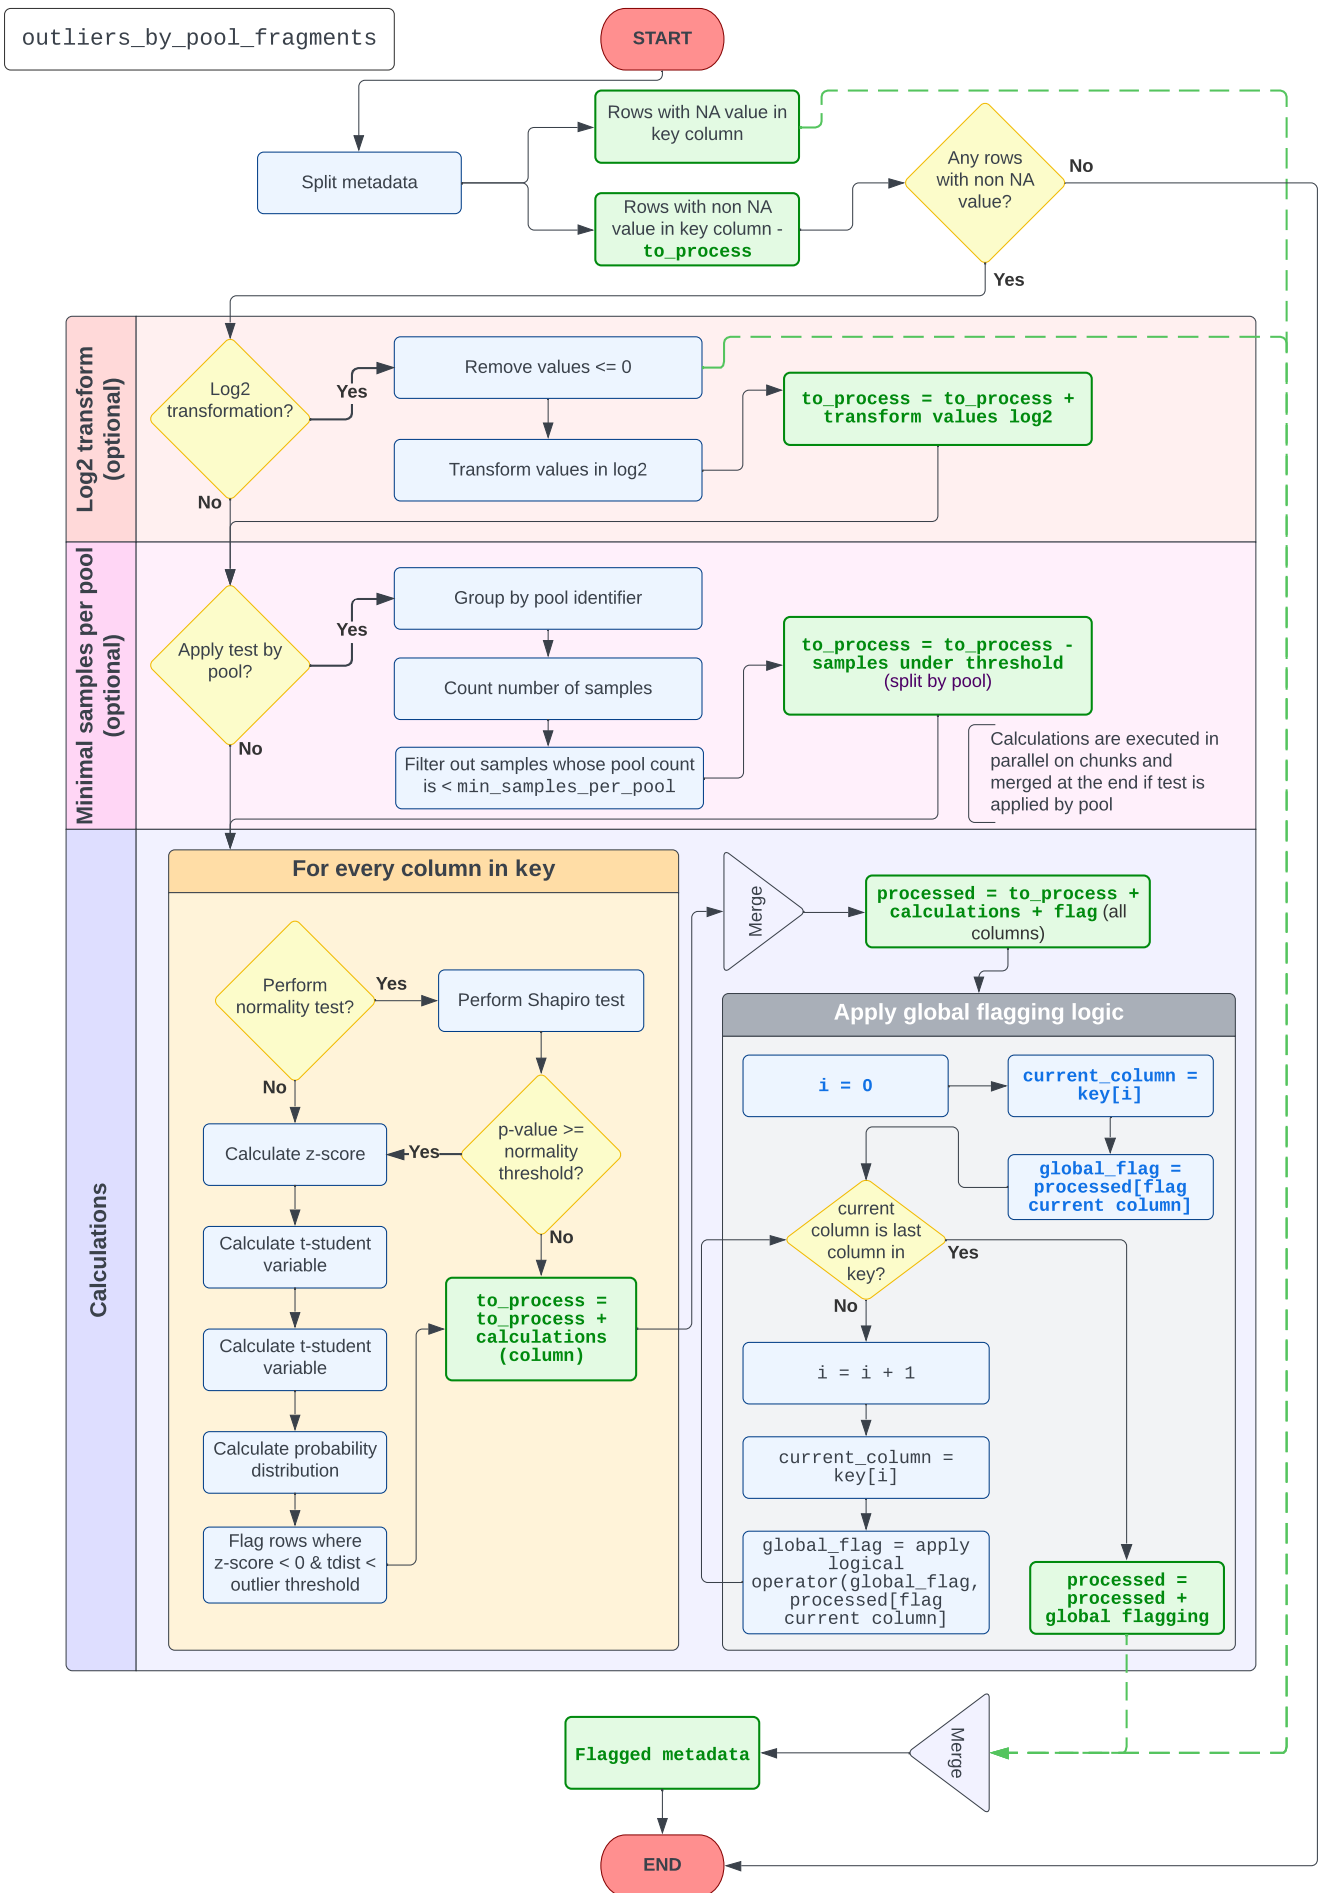



# Supplementary Figure 8

A

NGSdataExplorer Home Explore

Load data

**From R environment**

From file

Import a dataset from an environment

Select a data.frame:

association\_file

Select an environment in which to search:

Global Environment

✓ **Data ready to be imported!** data has 53 obs. of 83 variables.
 [click to see data](#)

➔ Import data

B

NGSdataExplorer Home Explore

Explore loaded data Plotting

Show  entries Search:

|   | ProjectID | FUSIONID  | PoolID | TagSequence | SubjectID | VectorType | VectorID | Experim |
|---|-----------|-----------|--------|-------------|-----------|------------|----------|---------|
|   | All       | All       | /      | All         | All       | All        | All      | All     |
| 1 | PJ01      | ET#382.46 | POOL01 | LTR75LC38   | PT001     | lenti      | GLOBE    |         |
| 2 | PJ01      | ET#381.40 | POOL01 | LTR53LC32   | PT001     | lenti      | GLOBE    |         |
| 3 | PJ01      | ET#381.9  | POOL01 | LTR83LC66   | PT001     | lenti      | GLOBE    |         |
| 4 | PJ01      | ET#381.71 | POOL01 | LTR27LC94   |           |            |          |         |
| 5 | PJ01      | ET#381.2  | POOL01 | LTR69LC52   |           |            |          |         |
| 6 | PJ01      | ET#382.28 | POOL01 | LTR37LC2    |           |            |          |         |
| 7 | PJ01      | ET#382.2  | POOL01 | LTR77LC46   |           |            |          |         |

C

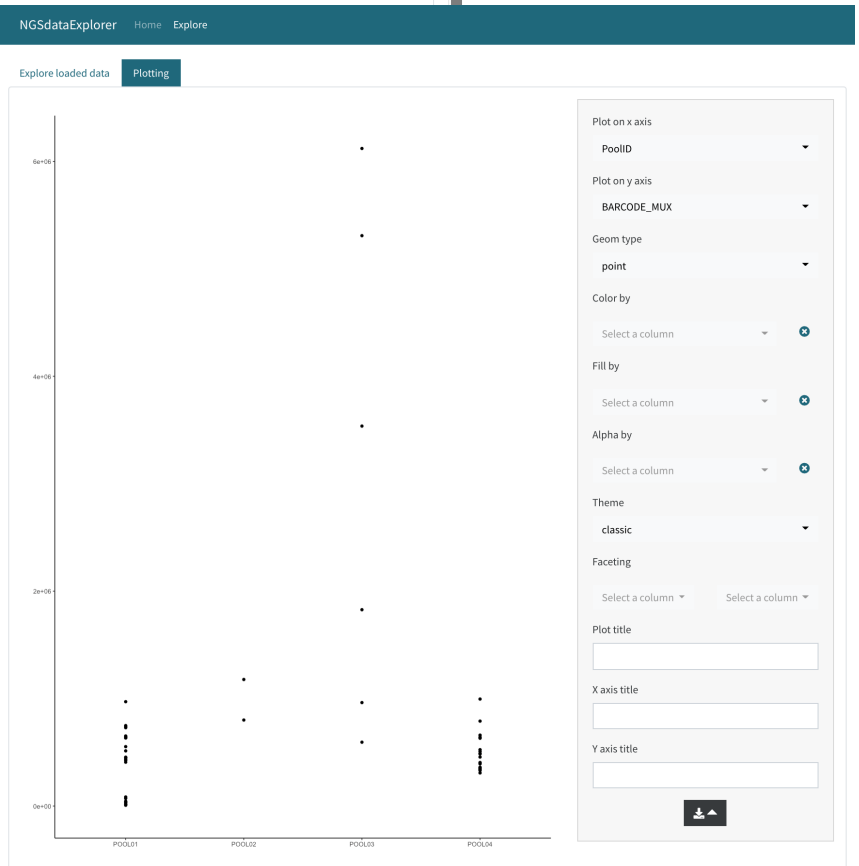

## Supplementary Figure 9

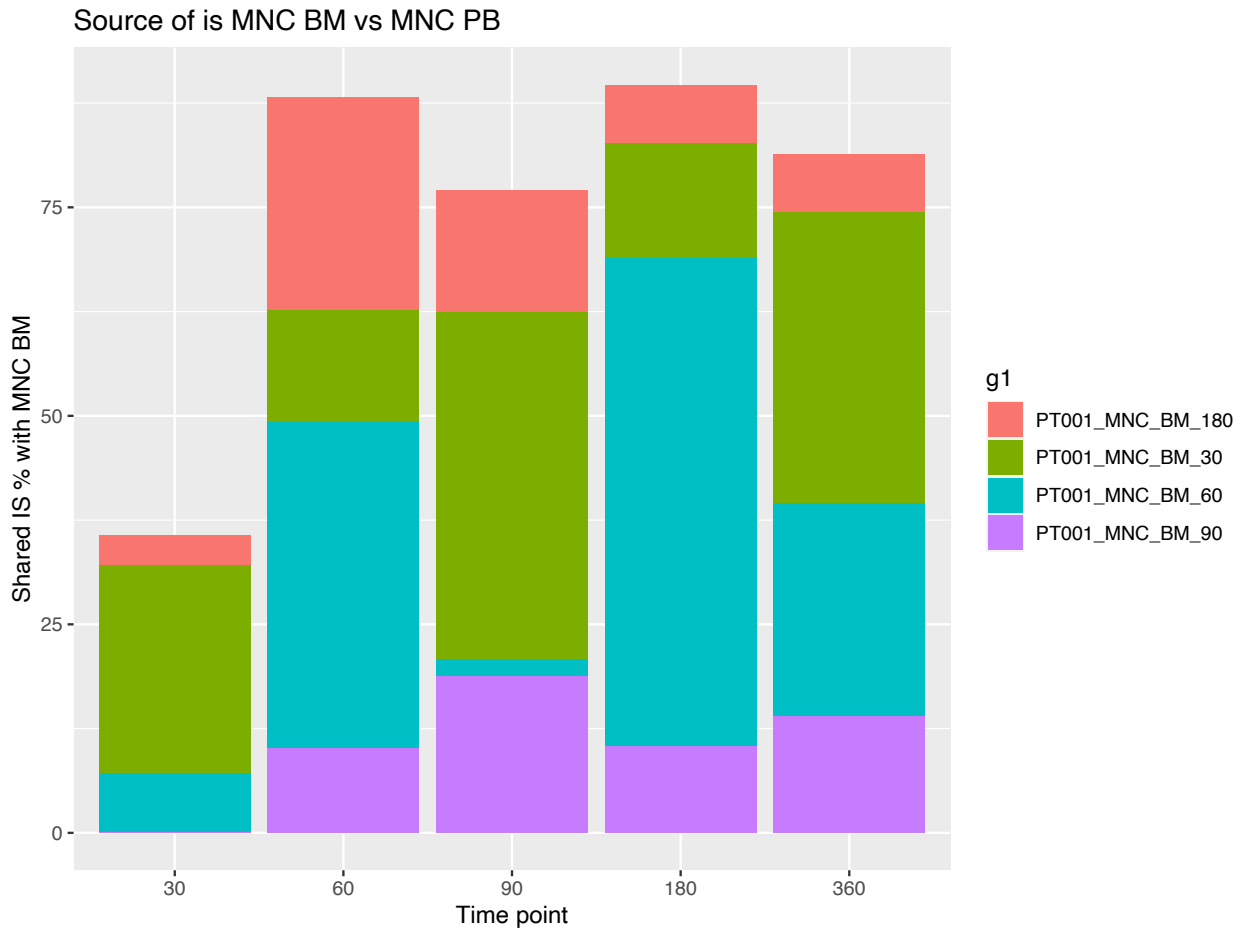

## Supplementary Figure 10

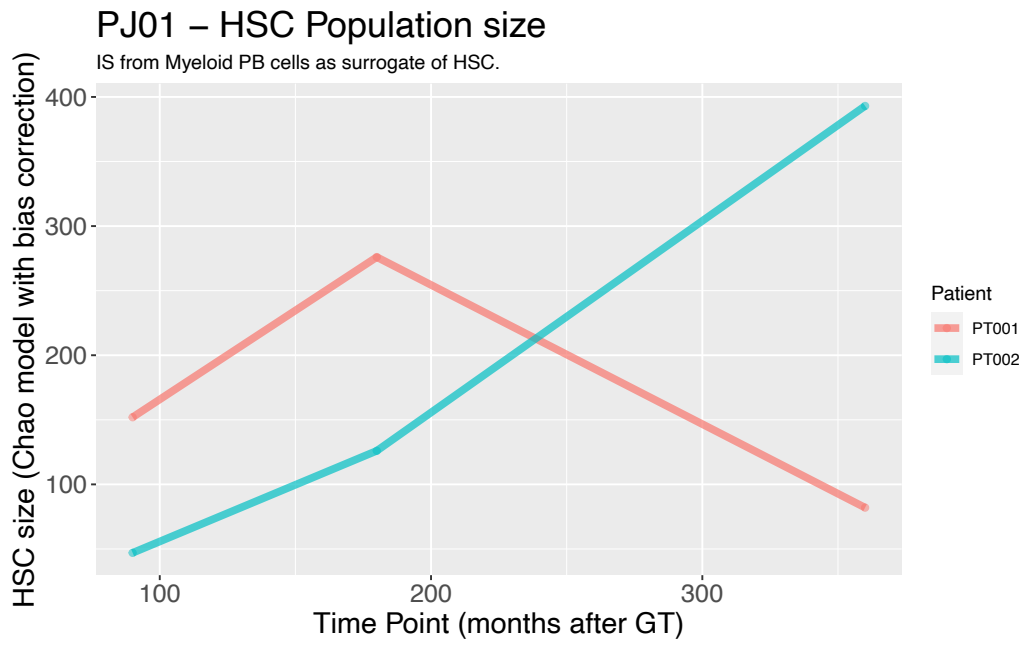

Supplement: pais_et_al-isanalytics-supplementary_figures_bbac551.pdf [file pais_et_al-isanalytics-supplementary_figures_bbac551.pdf]
